# Supplementary material
Source: Springer Nature journal article supplement (https://www.springermedizin.de/resource/supplementary/13031_2014_142_MOESM1_ESM.pdf/9645200)

National Quality Improvement / Assurance Department

Provincial Quality Improvement Team

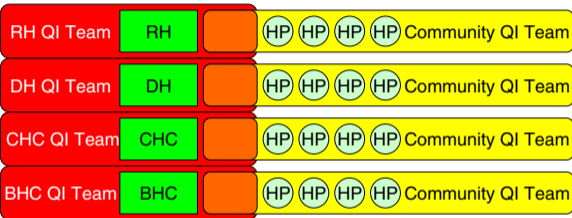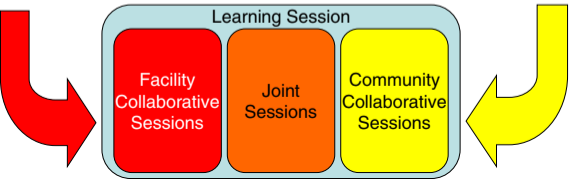

Supplement: MOESM1 [file 9645200]
